# Supplementary material
Source: publisher figshare collection journal article supplement (https://karger.figshare.com/ndownloader/files/27670947)
Supplement: Supplementary file 1 [file 27670947]

**
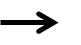

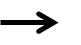

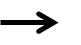

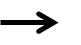

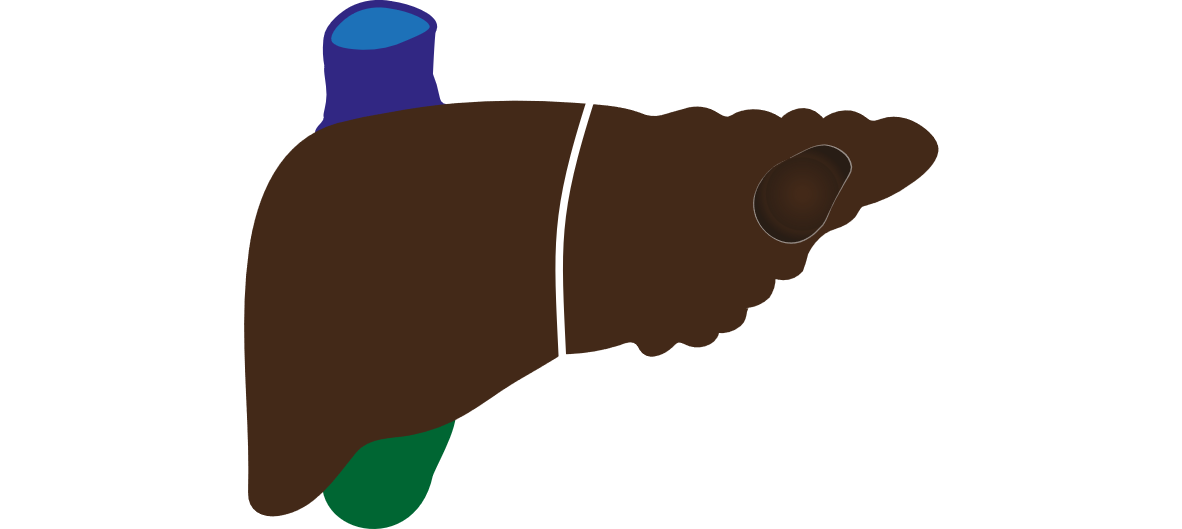

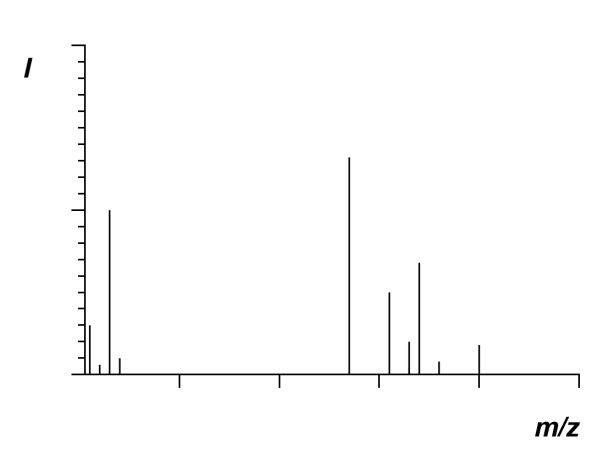

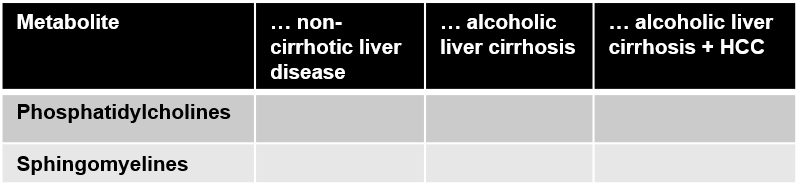

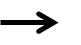
**

**Statistics**

**Comprehensive metabolomic analysis by mass spectrometry**

**Healthy controls vs. …**

**Peripheral blood draw**

**Blood processing**

**Storage at**

**-80°C**

**
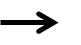
**

**Fig. S1**:Scheme of experimental workup.Peripheral venous blood was drawn from all individuals, centrifugated and plasma stored at -80°C until further examination. Vials with plasma were sent to Biocrates Life Sciences® where mass spectrometry was performed and data analysis conducted. Further statistics and interpretation of the data was then performed by us.
